# Supplementary material for: Protective Effect of Betulin on Streptozotocin–Nicotinamide-Induced Diabetes in Female Rats
Source: MDPI journal article supplement (doi:10.3390/ijms25042166), 2024-02-10
Supplement: s1 [file s1]

# Supplementary Materials

Article

## Protective Effect of Betulin on Streptozotocin–Nicotinamide-Induced Diabetes in Female Rats

Feyisayo O. Adepoju <sup>1</sup>, Ksenia V. Sokolova <sup>1,2</sup>, Irina F. Gette <sup>1,2</sup>, Irina G. Danilova <sup>1,2</sup>, Mikhail V. Tsurkan <sup>3</sup>, Alicia C. Mondragon <sup>4</sup>, Elena G. Kovaleva <sup>1,\*</sup> and Jose Manuel Miranda <sup>4,\*</sup>

<sup>1</sup> Department of Technology for Organic Synthesis, Institute of Chemical Technology, Ural Federal University, Mira 19, 620002 Yekaterinburg, Russia; besee010@gmail.com (F.O.A.); xenia.sokolova@gmail.com (K.V.S.); i.goette@yandex.ru (I.F.G.); ig-danilova@yandex.ru (I.G.D.)

<sup>2</sup> Institute of Immunology and Physiology, Russian Academy of Sciences, 620049 Yekaterinburg, Russia

<sup>3</sup> Leibniz Institute of Polymer Research, 01069 Dresden, Germany; tsurkan@ipfdd.de

<sup>4</sup> Departamento de Química Analítica, Nutrición y Bromatología, Campus Terra, Universidade da Santiago de Compostela, 27002 Lugo, Spain; alicia.mondragon@usc.es

\* Correspondence: e.g.kovaleva@urfu.ru (E.G.K.); josemanuel.miranda@usc.es (J.M.M.)

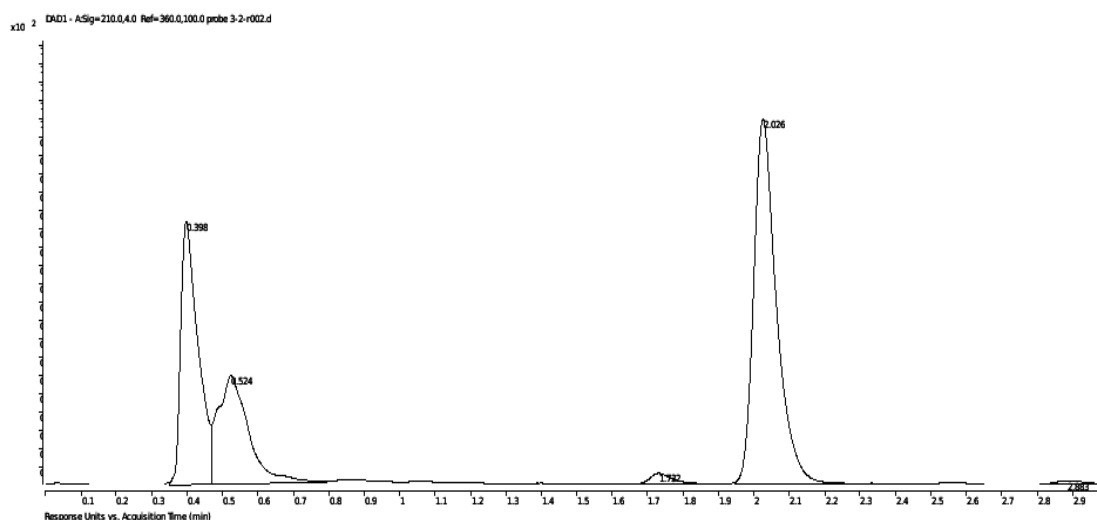

Figure S1. HPLC chromatogram of betulin at a retention time of 2.026 minutes.

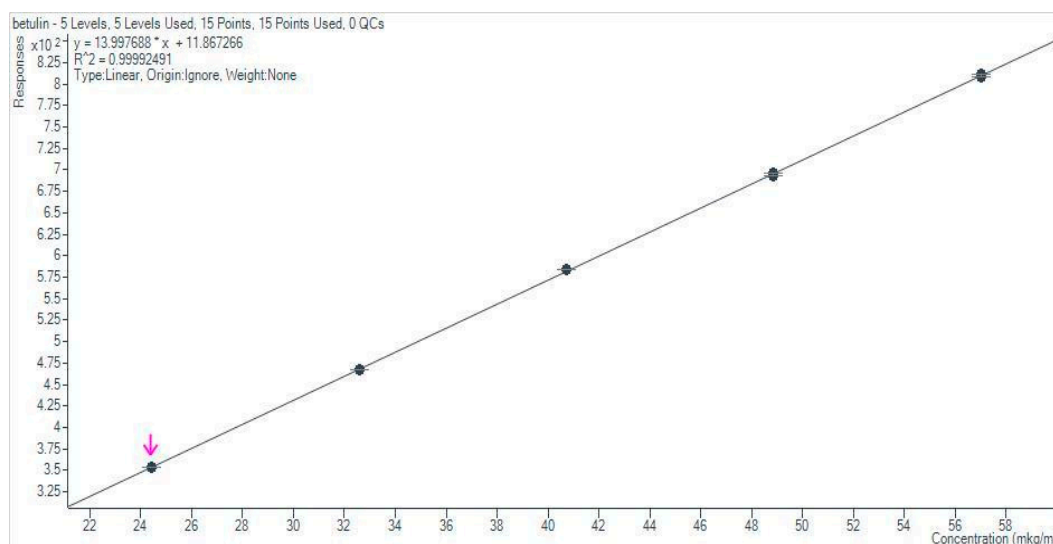

**Figure S2.** Calibration curve of betulin standard at different concentrations.

**Table S1.** Concentration of betulin emulsion at different time points before, during, and after the stability tests.

| Samples  | Exposure time at 55 °C,<br>in hours | Mass concentration of betulin in emulsion,<br>g/dm <sup>3</sup> | Emulsion layering,<br>yes/no |
|----------|-------------------------------------|-----------------------------------------------------------------|------------------------------|
| Emulsion | 0                                   | 4.12 ± 0.11                                                     | no                           |
| Vial 1   | 180                                 | 4.06 ± 0.04                                                     | no                           |
| Vial 2   | 360                                 | 4.07 ± 0.07                                                     | no                           |
| Vial 3   | 540                                 | 4.09 ± 0.11                                                     | no                           |
| Vial 4   | 720                                 | 4.17 ± 0.08                                                     | no                           |

**Table S2.** Effect of betulin intervention on oxidative stress parameters. Data are presented as mean ± standard error of mean (SEM); INT—healthy rats without any treatment, NC—healthy rats administered water, NC + BE50—healthy rats administered betulin (50 mg/kg), T2D—diabetic rats administered water, T2D + BE20—Diabetic rats administered betulin (20 mg/kg), T2D + BE50—diabetic rats administered betulin (50 mg/kg).

|            | Glutathione in blood<br>plasma, μmol/L | MDA in blood plasma<br>μmol/L | SOD<br>units/ GmHb | CAT<br>mmol/GmHb |
|------------|----------------------------------------|-------------------------------|--------------------|------------------|
| INT        | 20.5 ± 5.3                             | 3.19 ± 0.23                   | 112.5 ± 5.0        | 50.2 ± 2.0       |
| NC         | 88.2 ± 8.4                             | 3.75 ± 0.38                   | 132.4 ± 3.5        | 48.5 ± 2.8       |
| NC + BE50  | 47.2 ± 3.4                             | 2.60 ± 0.31                   | 130.8 ± 6.6        | 37.0 ± 2.6       |
| T2D        | 30.9 ± 4.8                             | 6.27 ± 0.25                   | 132.8 ± 8.7        | 48.9 ± 1.9       |
| T2D + BE20 | 77.7 ± 7.9                             | 5.73 ± 0.43                   | 132.2 ± 4.6        | 43.3 ± 1.9       |
| T2D + BE50 | 46.1 ± 5.3                             | 4.46 ± 0.19                   | 110.9 ± 13.7       | 45.3 ± 1.2       |

**Table S3.** Effect of betulin on oral glucose tolerance (OGTT) and Area under the curve (AUC) in rats. Data are presented as mean ± standard error of mean (SEM); INT—healthy rats without any treatment, T2D—diabetic rats administered water, T2D + BE20—Diabetic rats administered betulin (20 mg/kg), T2D + BE50—diabetic rats administered betulin (50 mg/kg).

|            | Glucose level, mmol/L |            |            |             | AUC,<br>mmol/L·min |
|------------|-----------------------|------------|------------|-------------|--------------------|
|            | Before load           | 30 minutes | 60 minutes | 120 minutes |                    |
| INT        | 5.9 ± 0.3             | 8.8 ± 0.3  | 6.5 ± 0.8  | 5.3 ± 0.8   | 802 ± 35           |
| T2D        | 10.3 ± 0.4            | 15.7 ± 1.9 | 14.2 ± 0.7 | 12.4 ± 0.8  | 1636 ± 113         |
| T2D + BE20 | 6.3 ± 0.6             | 8.1 ± 1.0  | 6.4 ± 0.5  | 4.6 ± 0.4   | 721 ± 53           |
| T2D + BE50 | 7.2 ± 0.5             | 10.7 ± 1.9 | 9.9 ± 1.7  | 6.6 ± 0.6   | 1061 ± 136         |

**Table S4.** Effect of betulin on serum insulin concentration and HOMA-IR. Data are presented as mean ± standard error of mean (SEM); INT—healthy rats without any treatment, NC + BE50—healthy rats administered betulin (50 mg/kg), T2D—diabetic rats administered water, T2D + BE20—Diabetic rats administered betulin (20 mg/kg), T2D + BE50—diabetic rats administered betulin (50 mg/kg).

|            | Insulin<br>μIU/mL | HOMA-IR     |
|------------|-------------------|-------------|
| INT        | 1.9 ± 0.25        | 0.5 ± 0.09  |
| NC + BE50  | 2.12 ± 0.72       | 0.81 ± 0.28 |
| T2D        | 1.98 ± 0.05       | 0.91 ± 0.06 |
| T2D + BE20 | 1.93 ± 0.48       | 0.55 ± 0.19 |
| T2D + BE50 | 2.22 ± 0.26       | 0.72 ± 0.13 |

**Table S5.** Effect of betulin intervention on hepatic and renal functions. Data are presented as mean  $\pm$  standard error of mean (SEM); INT—healthy rats without any treatment, NC—healthy rats administered water, NC + BE50—healthy rats administered betulin (50 mg/kg), T2D—diabetic rats administered water, T2D + BE20—Diabetic rats administered betulin (20 mg/kg), T2D + BE50—diabetic rats administered betulin (50 mg/kg).

|            | AST<br>$\mu\text{mol}/\text{min}\cdot\text{L}$ | ALT<br>$\mu\text{mol}/\text{min}\cdot\text{L}$ | ALP<br>$\mu\text{mol}/\text{min}\cdot\text{L}$ | Total protein<br>g/L | Urea<br>mmol/L | Creatinine<br>$\mu\text{mol}/\text{L}$ |
|------------|------------------------------------------------|------------------------------------------------|------------------------------------------------|----------------------|----------------|----------------------------------------|
| INT        | 16.1 $\pm$ 0.6                                 | 12.6 $\pm$ 0.6                                 | 51.5 $\pm$ 3.3                                 | 70.5 $\pm$ 1.3       | 5.2 $\pm$ 0.2  | 62.3 $\pm$ 1.5                         |
| NC         | 18.5 $\pm$ 0.8                                 | 12.8 $\pm$ 0.7                                 | 48.5 $\pm$ 4.3                                 | 67.3 $\pm$ 2.2       | 5.9 $\pm$ 0.3  | 60.2 $\pm$ 1.7                         |
| NC + BE50  | 17.4 $\pm$ 1.7                                 | 13.1 $\pm$ 0.8                                 | 32.0 $\pm$ 2.4                                 | 67.6 $\pm$ 1.3       | 5.2 $\pm$ 0.4  | 64.3 $\pm$ 1.6                         |
| T2D        | 24.7 $\pm$ 1.7                                 | 18.6 $\pm$ 1.2                                 | 40.8 $\pm$ 4.0                                 | 64.3 $\pm$ 2.1       | 7.9 $\pm$ 0.4  | 67.7 $\pm$ 0.7                         |
| T2D + BE20 | 21.7 $\pm$ 1.4                                 | 13.6 $\pm$ 0.8                                 | 30.4 $\pm$ 1.4                                 | 62.1 $\pm$ 1.6       | 7.0 $\pm$ 0.3  | 68.0 $\pm$ 3.3                         |
| T2D + BE20 | 20.2 $\pm$ 2.6                                 | 11.3 $\pm$ 1.4                                 | 27.6 $\pm$ 1.7                                 | 68.0 $\pm$ 1.5       | 5.8 $\pm$ 0.1  | 64.3 $\pm$ 1.9                         |

**Table S6.** Effect of betulin on blood glucose, glycosylated haemoglobin,  $\alpha$ -amylase, and glucose tolerance. Data are presented as mean  $\pm$  standard error of mean (SEM); INT—healthy rats without any treatment, NC—healthy rats administered water, NC + BE50—healthy rats administered betulin (50 mg/kg), T2D—diabetic rats administered water, T2D + BE20—Diabetic rats administered betulin (20 mg/kg), T2D + BE50—diabetic rats administered betulin (50 mg/kg).

|            | Glucose<br>mmol/L | HbA1c<br>%    | $\alpha$ -amylase<br>mg/s·L |
|------------|-------------------|---------------|-----------------------------|
| INT        | 5.9 $\pm$ 0.3     | 4.5 $\pm$ 0.2 | 30.9 $\pm$ 1.8              |
| NC         | 7.7 $\pm$ 0.3     | 4.4 $\pm$ 0.3 | 34.7 $\pm$ 0.7              |
| NC + BE50  | 8.6 $\pm$ 0.1     | 4.8 $\pm$ 0.4 | 45.0 $\pm$ 2.3              |
| T2D        | 10.3 $\pm$ 0.4    | 6.1 $\pm$ 0.4 | 43.7 $\pm$ 1.6              |
| T2D + BE20 | 6.3 $\pm$ 0.6     | 5.5 $\pm$ 0.7 | 38.1 $\pm$ 1.2              |
| T2D + BE20 | 7.2 $\pm$ 0.5     | 4.9 $\pm$ 0.2 | 35.1 $\pm$ 1.6              |

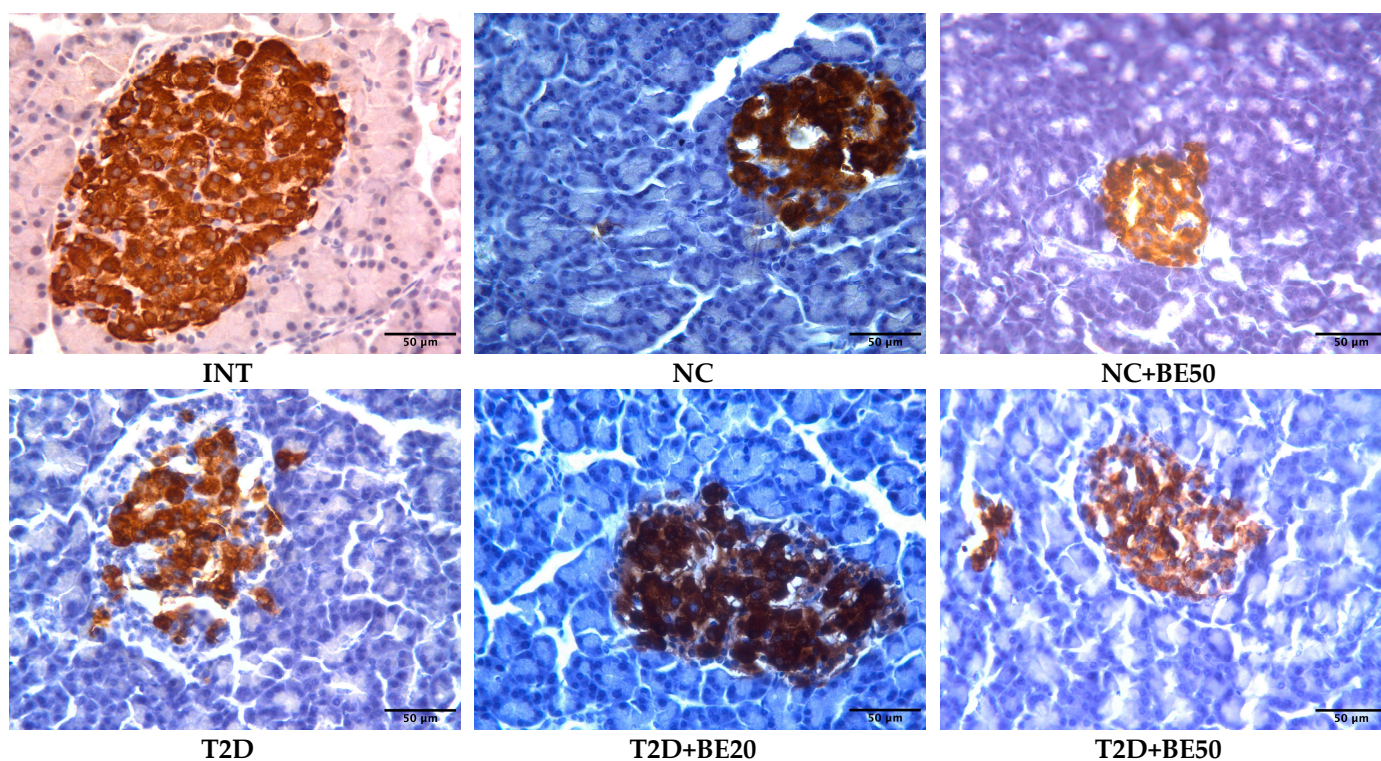

**Figure S3.** Pancreatic sections with immunohistochemical stain for insulin antibodies (brown) at  $\times 400$  magnification. INT—healthy rats without any treatment, NC—healthy rats administered water, NC + BE50—healthy rats administered betulin (50 mg/kg), T2D—diabetic rats administered water, T2D + BE20—Diabetic rats administered betulin (20 mg/kg), T2D + BE50—diabetic rats administered betulin (50 mg/kg).
